# Supplementary material for: Single-ion magnetism in seven-coordinate YbIII complexes with distorted D5h coordination geometry
Source: Royal Society of Chemistry journal article supplement (doi:10.1039/c7dt02461d), 2017-01-01
Supplement: c7dt02461d1.pdf [file c7dt02461d1.pdf]

## Single-Ion Magnetism in Seven-Coordinate Yb<sup>III</sup> Complexes with Distorted $D_{5h}$ Coordination Geometry

Dong-Qing Wu,<sup>a,c</sup> Dong Shao,<sup>a</sup> Xiao-Qin Wei,<sup>a</sup> Fu-Xing Shen,<sup>a</sup> Le Shi,<sup>a</sup> Yi-Quan Zhang,<sup>\*b</sup> Xin-Yi Wang<sup>\*a</sup>

<sup>a</sup> State Key Laboratory of Coordination Chemistry, Collaborative Innovation Center of Advanced Microstructures, School of Chemistry and Chemical Engineering, Nanjing University, Nanjing, 210093, China. E-mail: [wangxy66@nju.edu.cn](mailto:wangxy66@nju.edu.cn)

<sup>b</sup> Jiangsu Key Laboratory for NSLSCS, School of Physical Science and Technology, Nanjing Normal University, Nanjing, 210023, China

<sup>c</sup> School of Chemistry and Environmental Engineering, Anyang Institute of Technology, Anyang, 455000, China

# Supporting Information

## Table of contents

|                                                                                                                                                                                                                                            |     |
|--------------------------------------------------------------------------------------------------------------------------------------------------------------------------------------------------------------------------------------------|-----|
| <b>Fig. S1</b> TGA curve for compound <b>1</b> .....                                                                                                                                                                                       | S3  |
| <b>Fig. S2</b> TGA curve for compound <b>2</b> .....                                                                                                                                                                                       | S3  |
| <b>Fig. S3</b> Experimental and calculated PXRD patterns for compound <b>1</b> .....                                                                                                                                                       | S4  |
| <b>Fig. S4</b> Experimental and calculated PXRD patterns for compound <b>2</b> .....                                                                                                                                                       | S4  |
| <b>Fig.S5</b> Crystal packing of complex <b>1</b> . The dashed lines show the nearest intermolecular Yb··Yb separation. Hydrogen atoms and the solvents are omitted for clarity. ....                                                      | S5  |
| <b>Fig.S6</b> Crystal packing of complex <b>2</b> . The dashed lines show the nearest Yb··Yb distances. The pink parts represent the lattice H <sub>4</sub> bmsph molecules. Hydrogen atoms are omitted for clarity. ....                  | S5  |
| <b>Fig.S7</b> The field-dependent magnetization plots at indicated temperatures for <b>1</b> (left) and <b>2</b> (right). The solid lines represent the <i>ab initio</i> calculation results. Inset: the reduced magnetization plots. .... | S6  |
| <b>Fig. S8</b> Cole–Cole plots of $\chi''$ vs. $\chi'$ of <b>1</b> at 2.0 K under various applied dc fields. The solid lines represent the best fit of the experimental results with the generalized Debye model. ....                     | S6  |
| <b>Fig. S9</b> Cole–Cole plots of $\chi''$ vs. $\chi'$ of <b>2</b> at 2.0 K under various applied dc fields. The solid lines represent the best fit of the experimental results with the generalized Debye model. ....                     | S7  |
| <b>Fig. S11</b> Variable-temperature ac susceptibility data for <b>1</b> collected under a 1500 Oe dc field over the frequency range of 1 to 950 Hz. The solid lines are simply guides for the eye.....                                    | S8  |
| <b>Fig. S12</b> Variable-temperature ac susceptibility data for <b>2</b> collected under a 600 Oe dc field over the frequency range of 1 to 950 Hz. The solid lines are simply guides for the eye.....                                     | S9  |
| <b>Table S1</b> . Selected bond lengths (Å) and bond angles (°) for <b>1</b> and <b>2</b> . ....                                                                                                                                           | S9  |
| <b>Table S2</b> . Detailed analysis results by Continuous Shape Measures(CShM).....                                                                                                                                                        | S10 |
| <b>Table S3</b> . Relaxation fitting parameters from the least-square fitting of the Cole-Cole plots of compounds <b>1</b> and <b>2</b> at 2 K under various dc fields according to the generalized Debye model. ....                      | S11 |
| <b>Table S4</b> . Relaxation fitting parameters from the least-square fitting of the Cole-Cole plots of <b>1</b> and <b>2</b> under 1.8 K-5 K according to the generalized Debye model. ....                                               | S11 |
| <b>Table S5</b> . Parameters fitted from the Arrhenius plots in Fig.6 considering multiple relaxation processes .....                                                                                                                      | S12 |
| <b>Table S6</b> . Calculated energies and wave functions with definite projection of the total moment $ JM\rangle$ for the lowest four Kramers doublets (KDs) of Yb <sup>III</sup> fragments in compounds <b>1–2</b> .....                 | S13 |
| <b>Table S7</b> . Calculated energy levels (cm <sup>-1</sup> ), $\mathbf{g}$ ( $g_x, g_y, g_z$ ) tensors and $m_j$ values of the lowest Kramers doublets (KDs) of the Yb <sup>III</sup> fragments of compounds <b>1–2</b> . ....           | S13 |
| <b>Table S8</b> . <i>Ab initio</i> calculated crystal-field parameters for the investigated compounds <b>1–2</b> . <sup>a</sup> ....                                                                                                       | S14 |

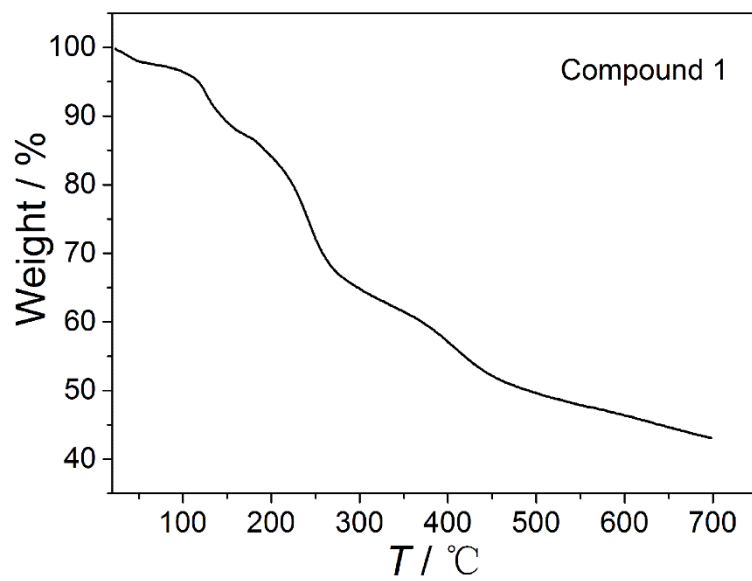

**Fig. S1** TGA curve for compound 1.

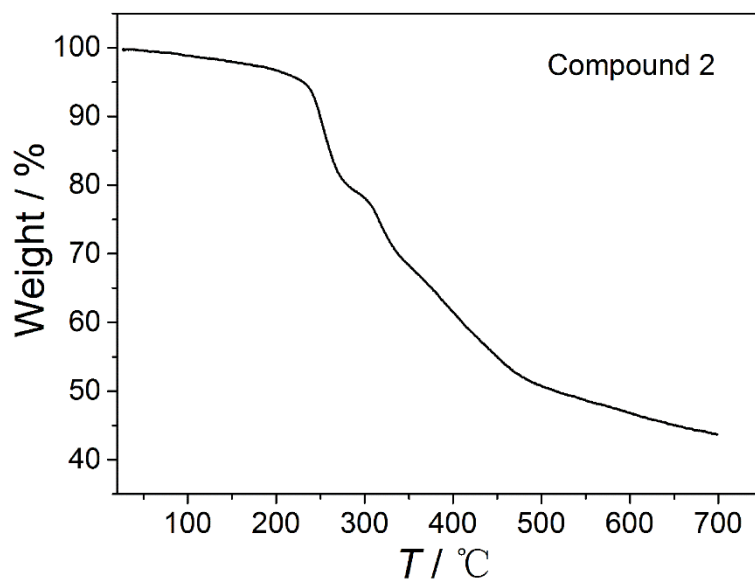

**Fig. S2** TGA curve for compound 2.

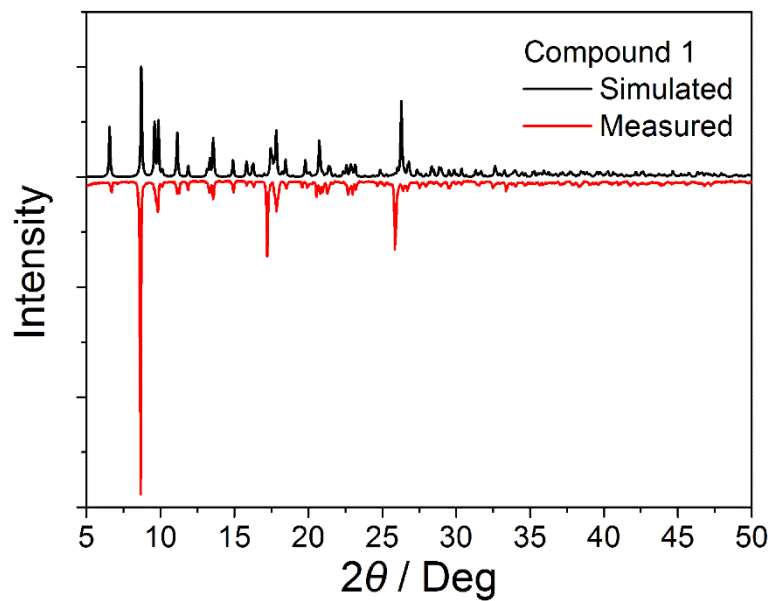

**Fig. S3** Experimental and calculated PXRD patterns for compound 1.

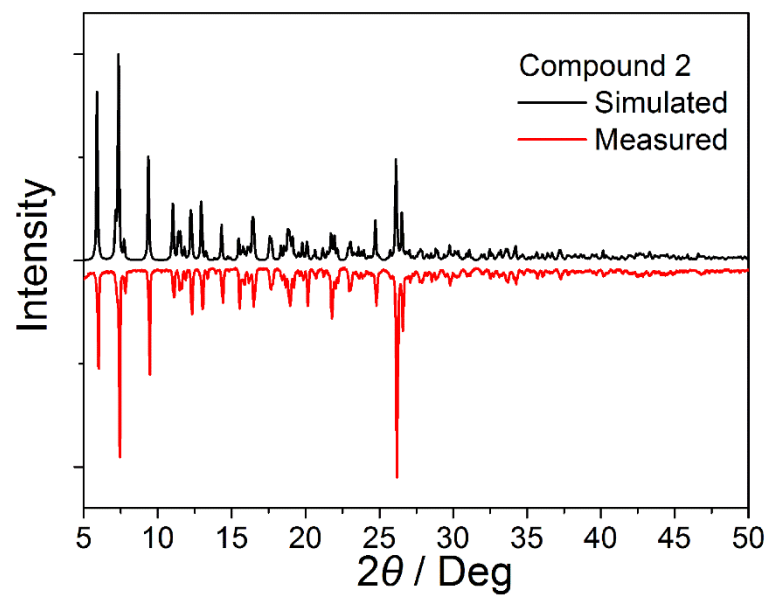

**Fig. S4** Experimental and calculated PXRD patterns for compound 2.

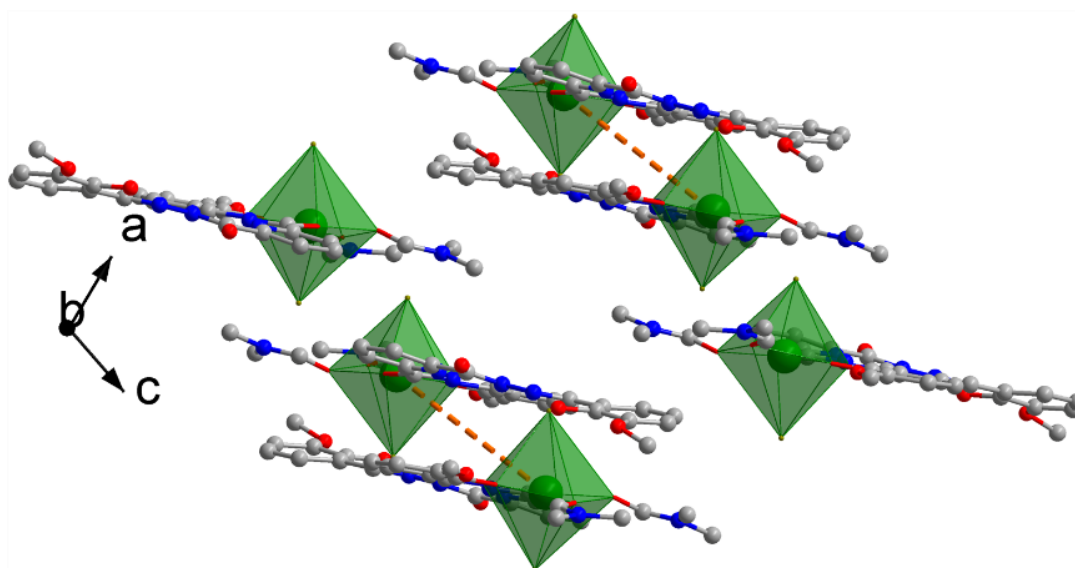

**Fig.S5** Crystal packing of complex **1**. The dashed lines show the nearest intermolecular Yb...Yb separation. Hydrogen atoms and the solvents are omitted for clarity.

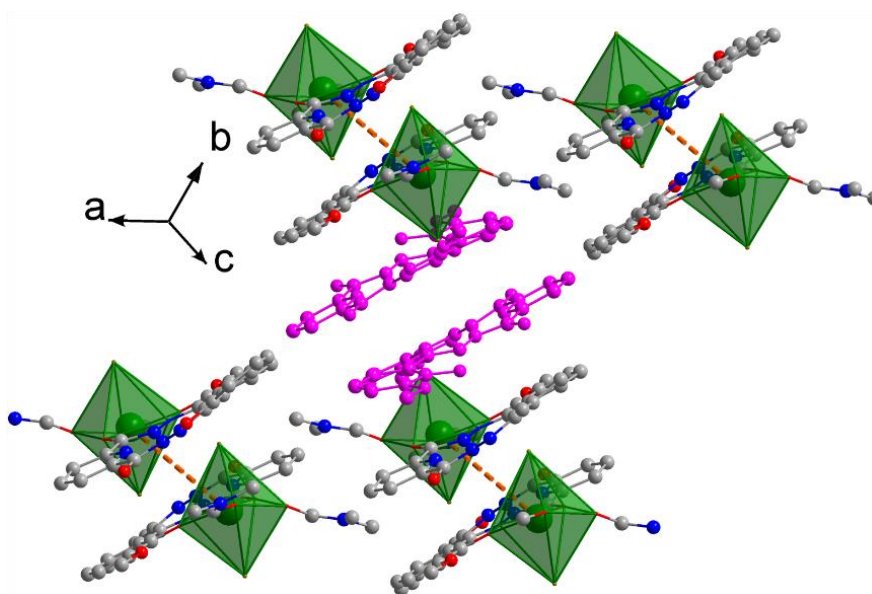

**Fig.S6** Crystal packing of complex **2**. The dashed lines show the nearest Yb...Yb distances. The pink parts represent the lattice H<sub>4</sub>bmsh molecules. Hydrogen atoms are omitted for clarity.

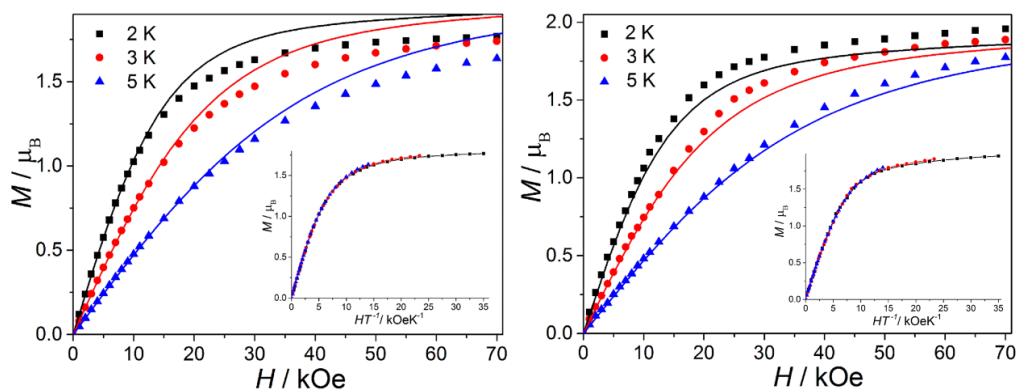

**Fig.S7** The field-dependent magnetization plots at indicated temperatures for **1**(left) and **2**(right). The solid lines represent the *ab initio* calculation results. Inset: the reduced magnetization plots.

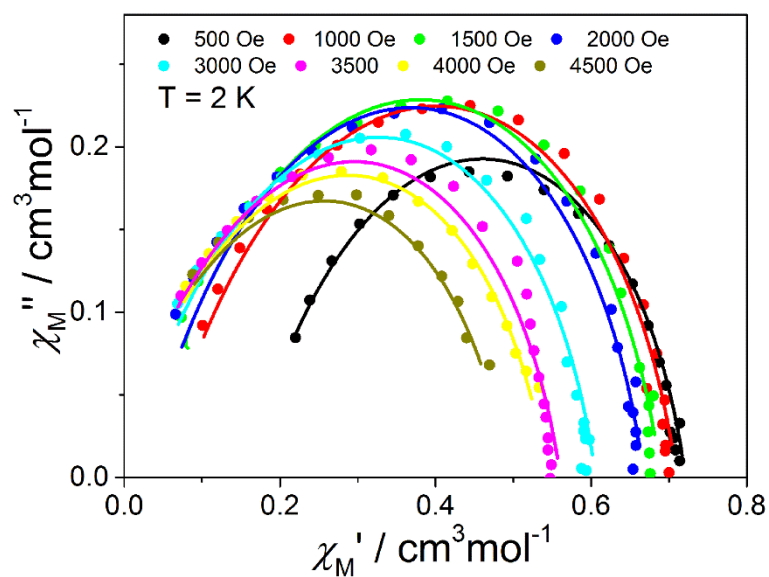

**Fig. S8** Cole–Cole plots of  $\chi''$  vs.  $\chi'$  of **1** at 2.0 K under various applied dc fields. The solid lines represent the best fit of the experimental results with the generalized Debye model.

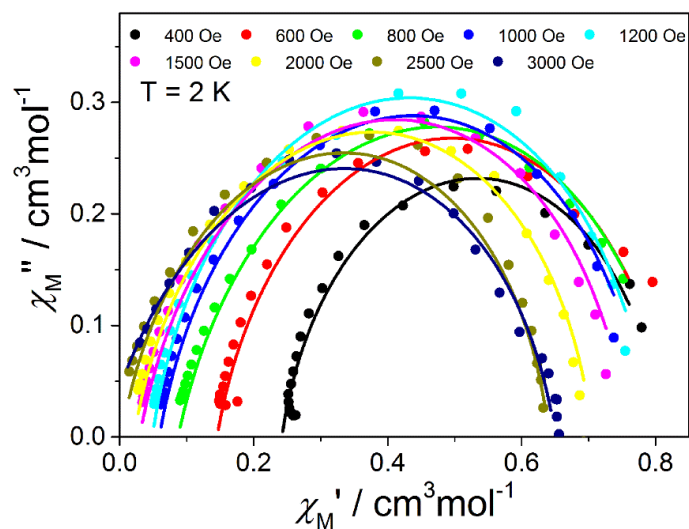

**Fig. S9** Cole–Cole plots of  $\chi''$  vs.  $\chi'$  of **2** at 2.0 K under various applied dc fields. The solid lines represent the best fit of the experimental results with the generalized Debye model.

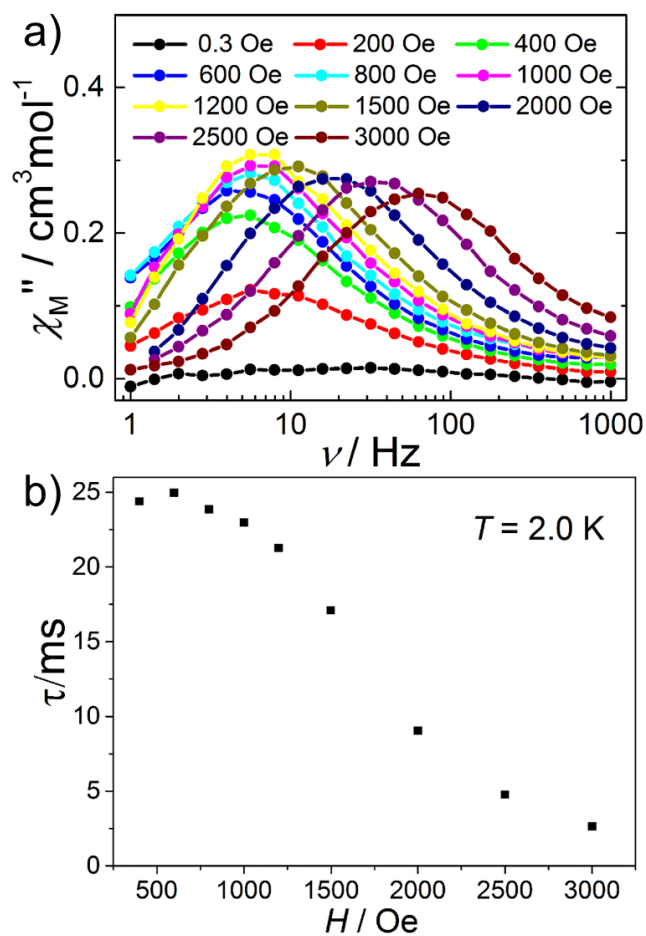

**Fig.S10** (a) Frequency dependence of the out-of-phase ( $\chi''$ ) magnetic susceptibility of **2** (1–1000 Hz) measured at 2.0 K in various applied fields from 0 to 4500 Oe. (b) Field dependence of the magnetic relaxation time at 2.0 K for **2**.

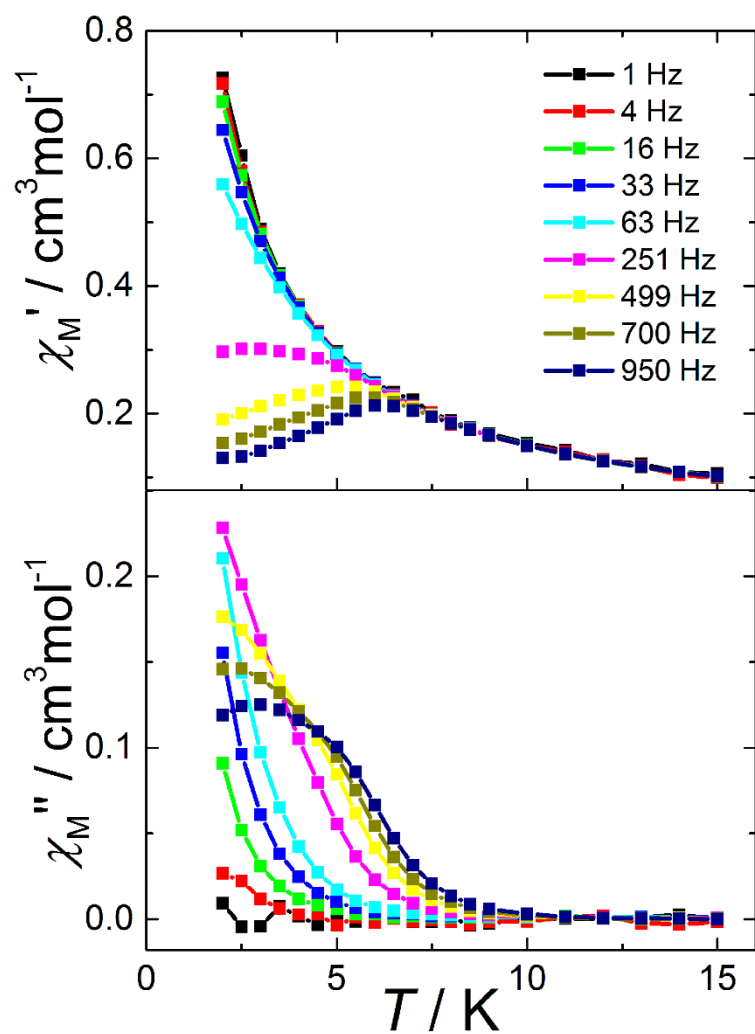

**Fig. S11** Variable-temperature ac susceptibility data for **1** collected under a 1500 Oe dc field over the frequency range of 1 to 950 Hz. The solid lines are simply guides for the eye.



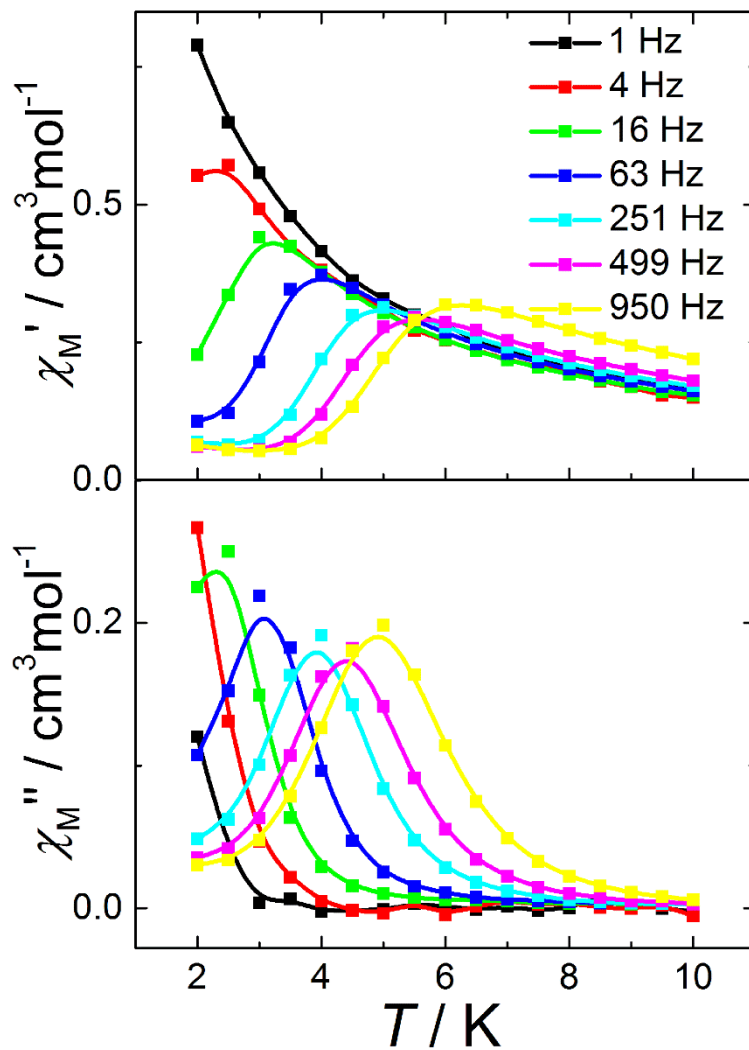

**Fig. S12** Variable-temperature ac susceptibility data for **2** collected under a 600 Oe dc field over the frequency range of 1 to 950 Hz. The solid lines are simply guides for the eye.

**Table S1.** Selected bond lengths ( $\text{\AA}$ ) and bond angles ( $^\circ$ ) for **1** and **2**.

| <b>Compound 1: [Yb(H<sub>3</sub>Bmshp)(DMF)<sub>2</sub>Cl<sub>2</sub>]<math>\cdot</math>DMF<math>\cdot</math>1.5H<sub>2</sub>O</b> |            |                 |           |                  |           |
|------------------------------------------------------------------------------------------------------------------------------------|------------|-----------------|-----------|------------------|-----------|
| <b>Bond distances [Å]</b>                                                                                                          |            |                 |           |                  |           |
| Yb(1)-O(4)                                                                                                                         | 2.127(2)   | Yb(1)-O(1)      | 2.345(2)  | Yb(1)-Cl(1)      | 2.6662(9) |
| Yb(1)-O(3)                                                                                                                         | 2.251(3)   | Yb(1)-N(3)      | 2.484(3)  |                  |           |
| Yb(1)-O(2)                                                                                                                         | 2.312(2)   | Yb(1)-Cl(2)     | 2.5781(9) |                  |           |
| <b>Bond angles</b>                                                                                                                 |            |                 |           |                  |           |
| O(4)-Yb(1)-O(3)                                                                                                                    | 147.84(10) | O(3)-Yb(1)-N(3) | 139.37(9) | N(3)-Yb(1)-Cl(2) | 84.77(7)  |
| O(4)-Yb(1)-O(2)                                                                                                                    | 76.94(9)   | O(2)-Yb(1)-N(3) | 148.64(9) | O(4)-Yb(1)-Cl(1) | 87.78(8)  |
| O(3)-Yb(1)-O(2)                                                                                                                    | 71.97(10)  | O(1)-Yb(1)-N(3) | 65.32(8)  | O(3)-Yb(1)-Cl(1) | 90.04(9)  |

|                                                                                               |            |                  |            |                   |            |
|-----------------------------------------------------------------------------------------------|------------|------------------|------------|-------------------|------------|
| O(4)-Yb(1)-O(1)                                                                               | 137.46(9)  | O(4)-Yb(1)-Cl(2) | 96.66(8)   | O(2)-Yb(1)-Cl(1)  | 100.68(8)  |
| O(3)-Yb(1)-O(1)                                                                               | 74.28(10)  | O(3)-Yb(1)-Cl(2) | 93.37(9)   | O(1)-Yb(1)-Cl(1)  | 86.25(7)   |
| O(2)-Yb(1)-O(1)                                                                               | 145.48(9)  | O(2)-Yb(1)-Cl(2) | 93.73(8)   | N(3)-Yb(1)-Cl(1)  | 83.51(6)   |
| O(4)-Yb(1)-N(3)                                                                               | 72.16(9)   | O(1)-Yb(1)-Cl(2) | 81.17(7)   | Cl(2)-Yb(1)-Cl(1) | 165.54(3)  |
| <b>Compound 2: [Yb(H<sub>3</sub>Bmshp)(DMF)<sub>2</sub>Cl<sub>2</sub>]·H<sub>4</sub>Bmshp</b> |            |                  |            |                   |            |
| <b>Bond distances [Å]</b>                                                                     |            |                  |            |                   |            |
| Yb(1)-O(4)                                                                                    | 2.125(4)   | Yb(1)-O(1)       | 2.354(4)   | Yb(1)-Cl(2)       | 2.6250(15) |
| Yb(1)-O(2)                                                                                    | 2.280(4)   | Yb(1)-N(3)       | 2.454(4)   |                   |            |
| Yb(1)-O(3)                                                                                    | 2.306(4)   | Yb(1)-Cl(1)      | 2.6088(16) |                   |            |
| <b>Bond angles</b>                                                                            |            |                  |            |                   |            |
| O(4)-Yb(1)-O(2)                                                                               | 79.00(16)  | O(2)-Yb(1)-N(3)  | 148.93(15) | N(3)-Yb(1)-Cl(1)  | 88.67(11)  |
| O(4)-Yb(1)-O(3)                                                                               | 147.85(18) | O(3)-Yb(1)-N(3)  | 138.52(16) | O(4)-Yb(1)-Cl(2)  | 99.39(13)  |
| O(2)-Yb(1)-O(3)                                                                               | 72.53(17)  | O(1)-Yb(1)-N(3)  | 65.76(13)  | O(2)-Yb(1)-Cl(2)  | 86.84(13)  |
| O(4)-Yb(1)-O(1)                                                                               | 137.04(14) | O(4)-Yb(1)-Cl(1) | 88.88(13)  | O(3)-Yb(1)-Cl(2)  | 93.71(14)  |
| O(2)-Yb(1)-O(1)                                                                               | 143.06(15) | O(2)-Yb(1)-Cl(1) | 99.78(13)  | O(1)-Yb(1)-Cl(2)  | 80.08(11)  |
| O(3)-Yb(1)-O(1)                                                                               | 74.03(16)  | O(3)-Yb(1)-Cl(1) | 81.68(14)  | N(3)-Yb(1)-Cl(2)  | 89.22(11)  |
| O(4)-Yb(1)-N(3)                                                                               | 71.28(14)  | O(1)-Yb(1)-Cl(1) | 90.43(11)  | Cl(1)-Yb(1)-Cl(2) | 170.31(5)  |

**Table S2.** Detailed analysis results by Continuous Shape Measures(CShM)

| Shape              | Heptagon | Hexagonal<br>pyramid | Pentagonal<br>bipyramid | Capped<br>octahedron | Capped<br>trigonal<br>prism | Johnson<br>pentagonal<br>bipyramid | Elongated<br>triangular<br>pyramid |
|--------------------|----------|----------------------|-------------------------|----------------------|-----------------------------|------------------------------------|------------------------------------|
| <b>Yb of<br/>1</b> | 33.346   | 25.560               | <b>0.865</b>            | 6.564                | 5.278                       | 6.551                              | 23.555                             |
| <b>Yb of<br/>2</b> | 34.337   | 24.593               | <b>1.094</b>            | 6.218                | 4.954                       | 6.874                              | 21.871                             |

**Table S3.** Relaxation fitting parameters from the least-square fitting of the Cole-Cole plots of compounds **1** and **2** at 2 K under various dc fields according to the generalized Debye model.

| Compound 1      |                                               |                                               |                   |          |
|-----------------|-----------------------------------------------|-----------------------------------------------|-------------------|----------|
| $H / \text{Oe}$ | $\chi_S / \text{cm}^3\text{mol}^{-1}\text{K}$ | $\chi_T / \text{cm}^3\text{mol}^{-1}\text{K}$ | $\tau / \text{s}$ | $\alpha$ |
| 500             | 0.16075                                       | 0.72103                                       | 0.00103           | 0.22765  |
| 1000            | 0.04555                                       | 0.70991                                       | 0.00112           | 0.23788  |
| 1500            | 0.02446                                       | 0.68968                                       | 0.00119           | 0.22833  |
| 2000            | 0.02579                                       | 0.66764                                       | 0.00115           | 0.21957  |
| 3000            | 0.00592                                       | 0.60565                                       | 0.00108           | 0.22888  |
| 3500            | 0.00345                                       | 0.5604                                        | 0.00105           | 0.24507  |
| 4000            | 0.00102                                       | 0.54333                                       | 0.00094           | 0.25192  |
| 4500            | 0.00227                                       | 0.49233                                       | 0.00066           | 0.25574  |
| Compound 2      |                                               |                                               |                   |          |
| $H / \text{Oe}$ | $\chi_S / \text{cm}^3\text{mol}^{-1}\text{K}$ | $\chi_T / \text{cm}^3\text{mol}^{-1}\text{K}$ | $\tau / \text{s}$ | $\alpha$ |
| 400             | 0.24215                                       | 0.80742                                       | 0.02439           | 0.11718  |
| 600             | 0.14528                                       | 0.8203                                        | 0.02497           | 0.13837  |
| 800             | 0.08709                                       | 0.82194                                       | 0.02385           | 0.16897  |
| 1000            | 0.05914                                       | 0.78549                                       | 0.02296           | 0.13878  |
| 1200            | 0.0487                                        | 0.79075                                       | 0.02127           | 0.11788  |
| 1500            | 0.02967                                       | 0.75835                                       | 0.01709           | 0.14885  |
| 2000            | 0.02145                                       | 0.70516                                       | 0.00854           | 0.13375  |
| 2500            | 0.00277                                       | 0.64041                                       | 0.00426           | 0.13417  |
| 3000            | 0.00121                                       | 0.65023                                       | 0.00265           | 0.20213  |

**Table S4.** Relaxation fitting parameters from the least-square fitting of the Cole-Cole plots of **1** and **2** under 1.8 K-5 K according to the generalized Debye model.

| Compound 1      |                                               |                                               |                   |          |
|-----------------|-----------------------------------------------|-----------------------------------------------|-------------------|----------|
| Temperature / K | $\chi_S / \text{cm}^3\text{mol}^{-1}\text{K}$ | $\chi_T / \text{cm}^3\text{mol}^{-1}\text{K}$ | $\tau / \text{s}$ | $\alpha$ |
| 1.8             | 0.07115                                       | 0.80117                                       | 0.00132           | 0.17814  |
| 1.9             | 0.05357                                       | 0.7649                                        | 0.00123           | 0.20234  |
| 2               | 0.06193                                       | 0.72939                                       | 0.00114           | 0.2003   |
| 2.2             | 0.04304                                       | 0.66223                                       | 9.4E-4            | 0.1871   |
| 2.4             | 0.0656                                        | 0.60944                                       | 8.5E-4            | 0.14824  |
| 2.6             | 0.06234                                       | 0.55823                                       | 7.4E-4            | 0.16812  |
| 2.8             | 0.08996                                       | 0.51914                                       | 6.5E-4            | 0.10336  |
| 3               | 0.06051                                       | 0.4912                                        | 5.7E-4            | 0.16777  |
| 3.2             | 0.08558                                       | 0.45478                                       | 5E-4              | 0.08829  |

| 3.4             | 0.06006                                       | 0.43615                                       | 4.3E-4            | 0.15456  |
|-----------------|-----------------------------------------------|-----------------------------------------------|-------------------|----------|
| 3.6             | 0.07848                                       | 0.40631                                       | 4E-4              | 0.10911  |
| 3.8             | 0.06659                                       | 0.39241                                       | 3.5E-4            | 0.14464  |
| 4               | 0.07597                                       | 0.36937                                       | 3.1E-4            | 0.13485  |
| 4.2             | 0.09799                                       | 0.34947                                       | 2.9E-4            | 0.03006  |
| 4.4             | 0.07058                                       | 0.33536                                       | 2.3E-4            | 0.10388  |
| 4.6             | 0.07939                                       | 0.31887                                       | 2.1E-4            | 0.06729  |
| 4.8             | 0.08142                                       | 0.31102                                       | 1.9E-4            | 0.1105   |
| 5               | 0.09349                                       | 0.29674                                       | 1.9E-4            | 0.04682  |
| Compound 2      |                                               |                                               |                   |          |
| Temperature / K | $\chi_S / \text{cm}^3\text{mol}^{-1}\text{K}$ | $\chi_T / \text{cm}^3\text{mol}^{-1}\text{K}$ | $\tau / \text{s}$ | $\alpha$ |
| 1.8             | 0.06457                                       | 0.91371                                       | 0.03628           | 0.16728  |
| 2               | 0.05695                                       | 0.8152                                        | 0.02489           | 0.16816  |
| 2.2             | 0.04807                                       | 0.73223                                       | 0.0174            | 0.14201  |
| 2.4             | 0.05423                                       | 0.68507                                       | 0.01271           | 0.12498  |
| 2.6             | 0.04306                                       | 0.60895                                       | 0.00787           | 0.09563  |
| 2.8             | 0.04251                                       | 0.56552                                       | 0.00553           | 0.0889   |
| 3               | 0.03147                                       | 0.57441                                       | 0.00389           | 0.08944  |
| 3.2             | 0.02967                                       | 0.4906                                        | 0.00238           | 0.07199  |
| 3.4             | 0.02796                                       | 0.46026                                       | 0.00163           | 0.05293  |
| 3.8             | 0.00642                                       | 0.42769                                       | 8.1E-4            | 0.07681  |
| 4               | 0.00399                                       | 0.39634                                       | 5.4E-4            | 0.05556  |
| 4.2             | 0.00783                                       | 0.38507                                       | 3.9E-4            | 0.07149  |
| 4.4             | 0.02674                                       | 0.36457                                       | 2.8E-4            | 0.06106  |
| 4.6             | 0.00258                                       | 0.35551                                       | 2.3E-4            | 0.03     |
| 4.8             | 0.03749                                       | 0.34806                                       | 2E-4              | 0.06068  |
| 5               | 0.01596                                       | 0.33323                                       | 1.4E-4            | 0.05419  |

**Table S5.** Parameters fitted from the Arrhenius plots in Fig.6 considering multiple relaxation processes

| Compound 1       |         |                |                |
|------------------|---------|----------------|----------------|
|                  | Value   | Standard error | R <sup>2</sup> |
| A                | 368.14  | 12.93          | 0.99           |
| C                | 12.24   | 2.92           |                |
| n                | 3.62    | 0.15           |                |
| Compound 2       |         |                |                |
|                  | Value   | Standard error | R <sup>2</sup> |
| A                | 10.22   | 0.95           | 0.99           |
| C                | 0.38    | 0              |                |
| n                | 5.60    | 0.12           |                |
| $\tau_0$         | 5.77E-7 | 0              |                |
| $U_{\text{eff}}$ | 30.43   | 0.75           |                |

**Table S6.** Calculated energies and wave functions with definite projection of the total moment  $|JM\rangle$  for the lowest four Kramers doublets (KDs) of Yb<sup>III</sup> fragments in compounds **1–2**.

|          | $E/\text{cm}^{-1}$ | wave functions                                                                             |
|----------|--------------------|--------------------------------------------------------------------------------------------|
| <b>1</b> | 0.0                | 99% $ \pm 1/2\rangle$                                                                      |
|          | 197.7              | 84% $ \pm 3/2\rangle$ +13% $ \pm 5/2\rangle$                                               |
|          | 421.1              | 19% $ \pm 7/2\rangle$ +69% $ \pm 5/2\rangle$ +12% $ \pm 3/2\rangle$                        |
|          | 543.5              | 77% $ \pm 7/2\rangle$ +18% $ \pm 5/2\rangle$                                               |
| <b>2</b> | 0.0                | 62% $ \pm 7/2\rangle$ +30% $ \pm 3/2\rangle$ +5% $ \pm 1/2\rangle$                         |
|          | 187.0              | 9% $ \pm 7/2\rangle$ +60% $ \pm 5/2\rangle$ +5% $ \pm 3/2\rangle$ +26% $ \pm 1/2\rangle$   |
|          | 381.0              | 15% $ \pm 7/2\rangle$ +27% $ \pm 5/2\rangle$ +21% $ \pm 3/2\rangle$ +37% $ \pm 1/2\rangle$ |
|          | 457.7              | 15% $ \pm 7/2\rangle$ +9% $ \pm 5/2\rangle$ +44% $ \pm 3/2\rangle$ +32% $ \pm 1/2\rangle$  |

**Table S7.** Calculated energy levels ( $\text{cm}^{-1}$ ),  $\mathbf{g}$  ( $g_x, g_y, g_z$ ) tensors and  $m_J$  values of the lowest Kramers doublets (KDs) of the Yb<sup>III</sup> fragments of compounds **1–2**.

| KDs | <b>1(Yb_1)</b>     |              |           | <b>3(Yb_2)</b>     |              |           |
|-----|--------------------|--------------|-----------|--------------------|--------------|-----------|
|     | $E/\text{cm}^{-1}$ | $\mathbf{g}$ | $m_J$     | $E/\text{cm}^{-1}$ | $\mathbf{g}$ | $m_J$     |
| 1   | 0.0                | 4.875        | $\pm 1/2$ | 0.0                | 0.888        | $\pm 7/2$ |
|     |                    | 4.120        |           |                    | 2.854        |           |
|     |                    | 1.095        |           |                    | 5.727        |           |
| 2   | 197.7              | 1.785        | $\pm 3/2$ | 187.0              | 0.841        | $\pm 5/2$ |
|     |                    | 1.920        |           |                    | 2.211        |           |
|     |                    | 3.664        |           |                    | 4.061        |           |
| 3   | 421.1              | 1.102        | $\pm 5/2$ | 381.0              | 0.994        | $\pm 1/2$ |
|     |                    | 2.896        |           |                    | 2.969        |           |
|     |                    | 5.003        |           |                    | 5.144        |           |
| 4   | 543.5              | 0.687        | $\pm 7/2$ | 457.7              | 0.876        | $\pm 3/2$ |
|     |                    | 0.969        |           |                    | 1.244        |           |
|     |                    | 7.479        |           |                    | 7.016        |           |

**Table S8.** *Ab initio* calculated crystal-field parameters for the investigated compounds**1–2.<sup>a</sup>**

|                 |                 | <b>B(<i>k,q</i>)</b>          |                          |
|-----------------|-----------------|-------------------------------|--------------------------|
| <b><i>k</i></b> | <b><i>q</i></b> | <b>1</b>                      | <b>2</b>                 |
| 2               | –2              | 0.1790×10 <sup>1</sup>        | 0.3899×10 <sup>1</sup>   |
| 2               | –1              | 0.7419×10 <sup>1</sup>        | –0.4266×10 <sup>–1</sup> |
| 2               | 0               | <b>0.12741×10<sup>2</sup></b> | –0.5277×10 <sup>1</sup>  |
| 2               | 1               | –0.67245×10 <sup>1</sup>      | –0.1602×10 <sup>1</sup>  |
| 2               | 2               | 0.3841                        | 0.1473×10 <sup>2</sup>   |
| 4               | –4              | –0.1081                       | 0.8364×10 <sup>–1</sup>  |
| 4               | –3              | 0.1141                        | 0.5015×10 <sup>–2</sup>  |
| 4               | –2              | 0.9297×10 <sup>–1</sup>       | –0.5019×10 <sup>–1</sup> |
| 4               | –1              | 0.1016                        | 0.5316                   |
| 4               | 0               | –0.1358                       | –0.1025×10 <sup>–1</sup> |
| 4               | 1               | –0.1597                       | 0.4306×10 <sup>–1</sup>  |
| 4               | 2               | 0.2501                        | 0.7658                   |
| 4               | 3               | 0.2451                        | –0.1044                  |
| 4               | 4               | –0.6925                       | –0.2964                  |
| 6               | –6              | 0.9408×10 <sup>–4</sup>       | –0.4436×10 <sup>–2</sup> |
| 6               | –5              | 0.5269×10 <sup>–2</sup>       | –0.8132×10 <sup>–1</sup> |
| 6               | –4              | 0.3820×10 <sup>–2</sup>       | 0.4574×10 <sup>–3</sup>  |
| 6               | –3              | 0.2182×10 <sup>–2</sup>       | 0.8781×10 <sup>–2</sup>  |
| 6               | –2              | –0.1640×10 <sup>–3</sup>      | 0.1736×10 <sup>–3</sup>  |
| 6               | –1              | –0.6440×10 <sup>–2</sup>      | –0.6961×10 <sup>–2</sup> |
| 6               | 0               | 0.3147×10 <sup>–2</sup>       | –0.1206×10 <sup>–2</sup> |
| 6               | 1               | 0.5682×10 <sup>–4</sup>       | 0.2771×10 <sup>–2</sup>  |
| 6               | 2               | 0.1168×10 <sup>–1</sup>       | 0.1167×10 <sup>–1</sup>  |
| 6               | 3               | 0.7592×10 <sup>–2</sup>       | 0.4136×10 <sup>–2</sup>  |
| 6               | 4               | –0.9253×10 <sup>–4</sup>      | –0.6725×10 <sup>–2</sup> |
| 6               | 5               | –0.7073×10 <sup>–2</sup>      | –0.6472×10 <sup>–2</sup> |
| 6               | 6               | –0.6762×10 <sup>–2</sup>      | 0.2257×10 <sup>–1</sup>  |

<sup>a</sup>Only the ranks *k* = 2, 4, and 6 are shown; higher ranks are much smaller and are not shown here.
